# Supplementary material for: KLK6 proteolysis is implicated in the turnover and uptake of extracellular alpha-synuclein species
Source: PubMed Central journal article supplement (PMC5362421; doi:10.18632/oncotarget.13264), 2016-11-10
Supplement: oncotarget-08-14502-s001.pdf [file oncotarget-08-14502-s001.pdf]

# KLK6 proteolysis is implicated in the turnover and uptake of extracellular alpha-synuclein species

## Supplementary Materials

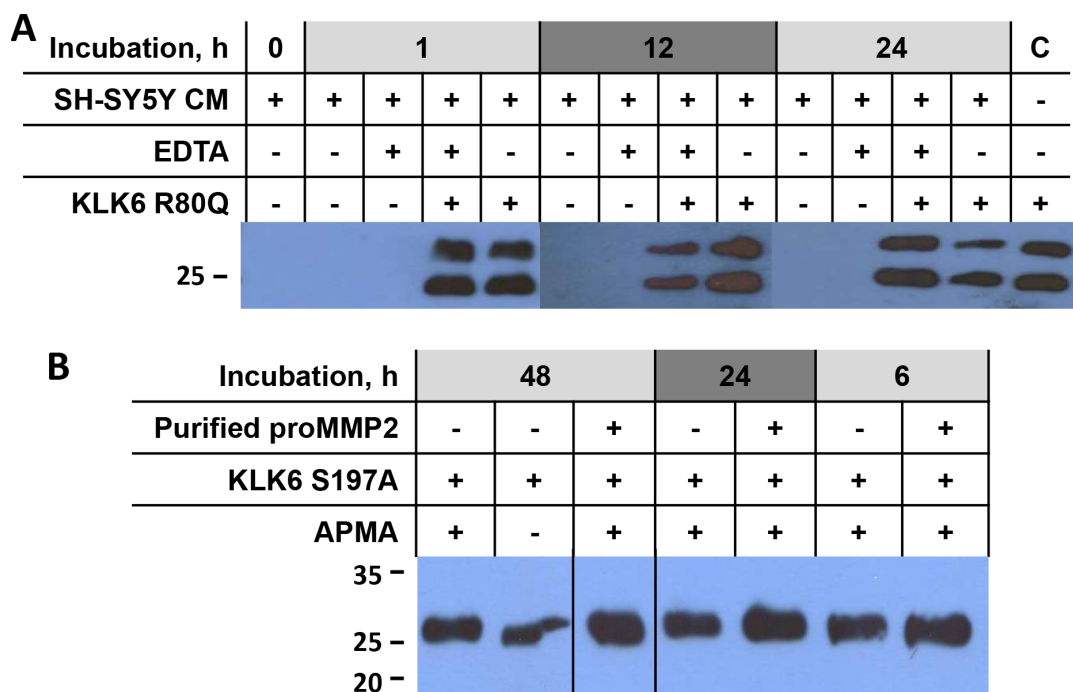

**Supplementary Figure S1: Stability of KLK6.** (A) KLK6 is active in the presence of CM from SH-SY5Y cells in the presence or absence of EDTA. (B) KLK6 is not degraded by MMP2. KLK6 S197A was used in order to avoid self-degradation upon extended incubation period (48 hours).

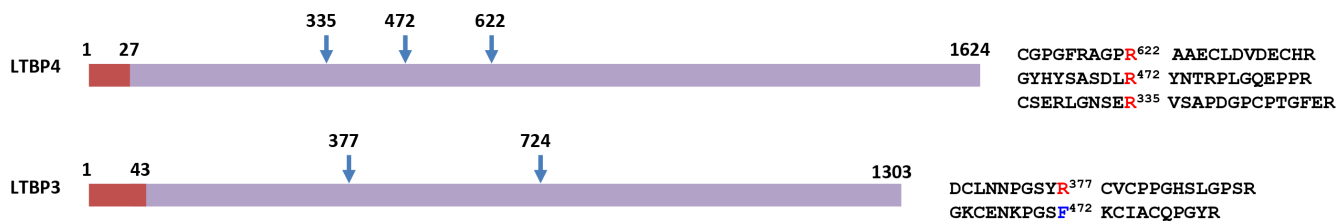

**Supplementary Figure S2: Cleavage of latent TGF- $\beta$  binding proteins by KLK6 as identified by TAILS.**

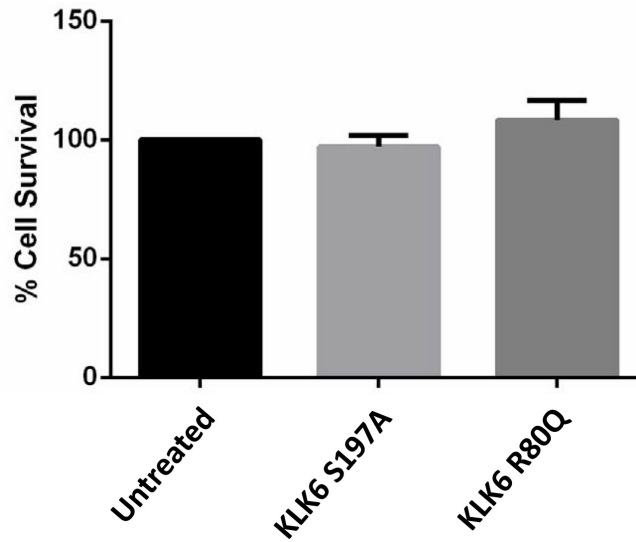

Supplementary Figure S3: Adenoviral expression of active KLK6 R80Q or inactive KLK6 S197A does not affect cell viability.

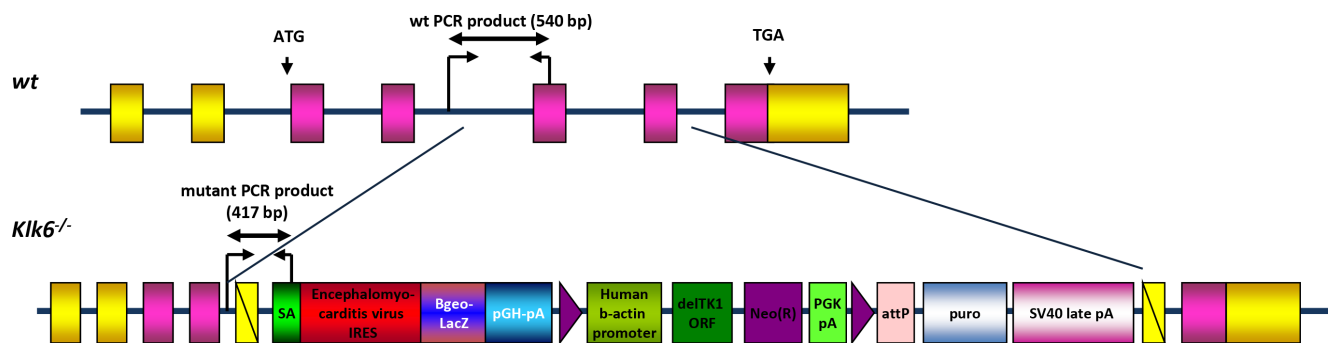

Supplementary Figure S4: Schematic diagram of the generation of *Klk6*<sup>-/-</sup> mice.

Supplementary Table S1: Results from the first TAILS analysis. See Supplementary\_Table\_S1

Supplementary Table S2: Results from the second TAILS analysis. See Supplementary\_Table\_S2

Supplementary Table S3: Cleavage sites identified by both TAILS with Fc > 2. See Supplementary\_Table\_S3
